# Supplementary figures and images for: The structural mobility of zinc complexes with tetradentate tripodal ligands derived from the amino acids glycine and phenylalanineElectronic supplementary information (ESI) available: Fig. S1: 1H NMR spectra (CDCl3 solutions) of the bpaAc–Phe–OMe complexes 1b/2b, 3bo, 5b and 8b at room temperature. See http://www.rsc.org/suppdata/dt/b2/b212049f/
Source: Royal Society of Chemistry journal article supplement (doi:10.1039/b212049f), 2003-02-06

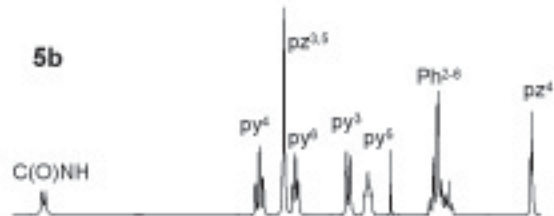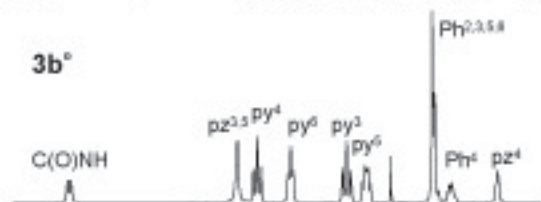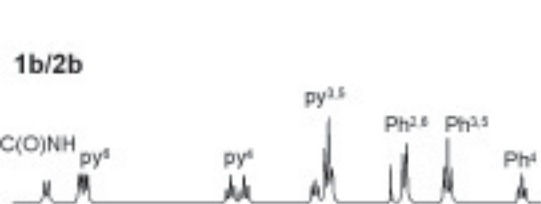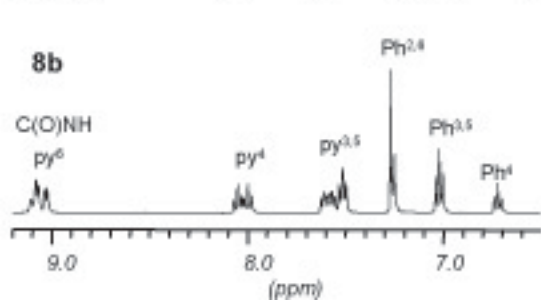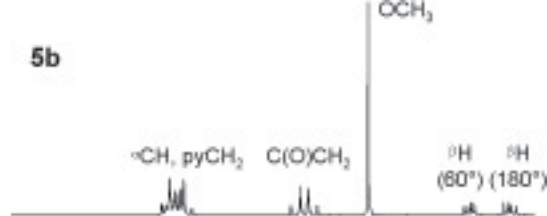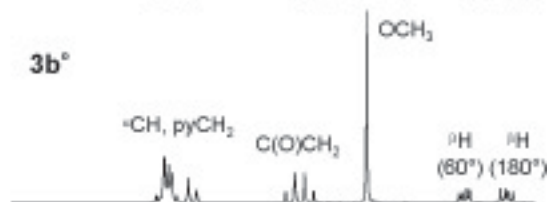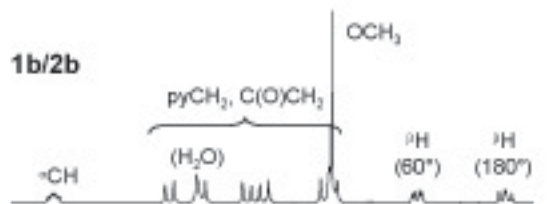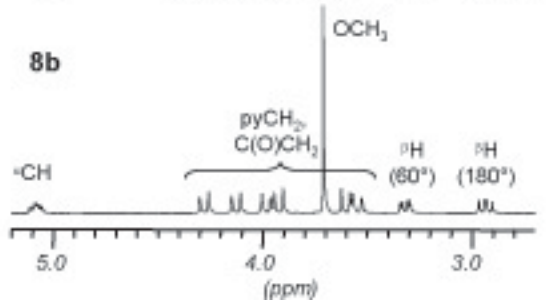

Supplement: b212049f.pdf [file b212049f.pdf]
